# Supplementary material for: Erianin facilitates pyroptosis in endometrial cancer via targeting m6A reader YTHDF1
Source: Research Square preprint supplement (doi:10.21203/rs.3.rs-6876152/v1), 2025-06-23
Supplement: Supplementary file 1 [file 82796e6f65e4e917aea7a7a4.docx]

**Figure S1:**


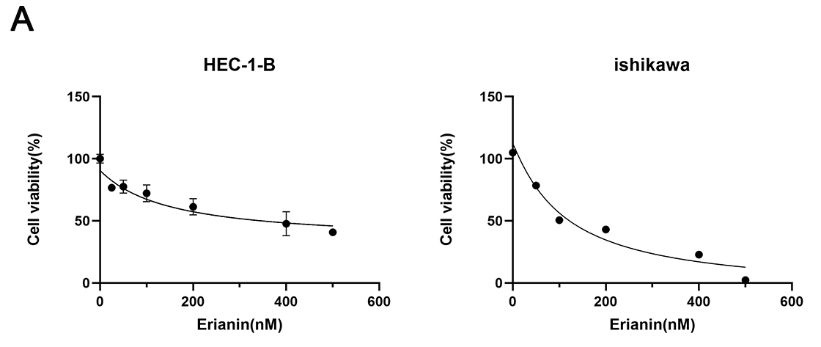


1. IC50 value of Ishikawa cells and HEC-1-B cells after 24 h of treatment with erianin.

**Figure S2**


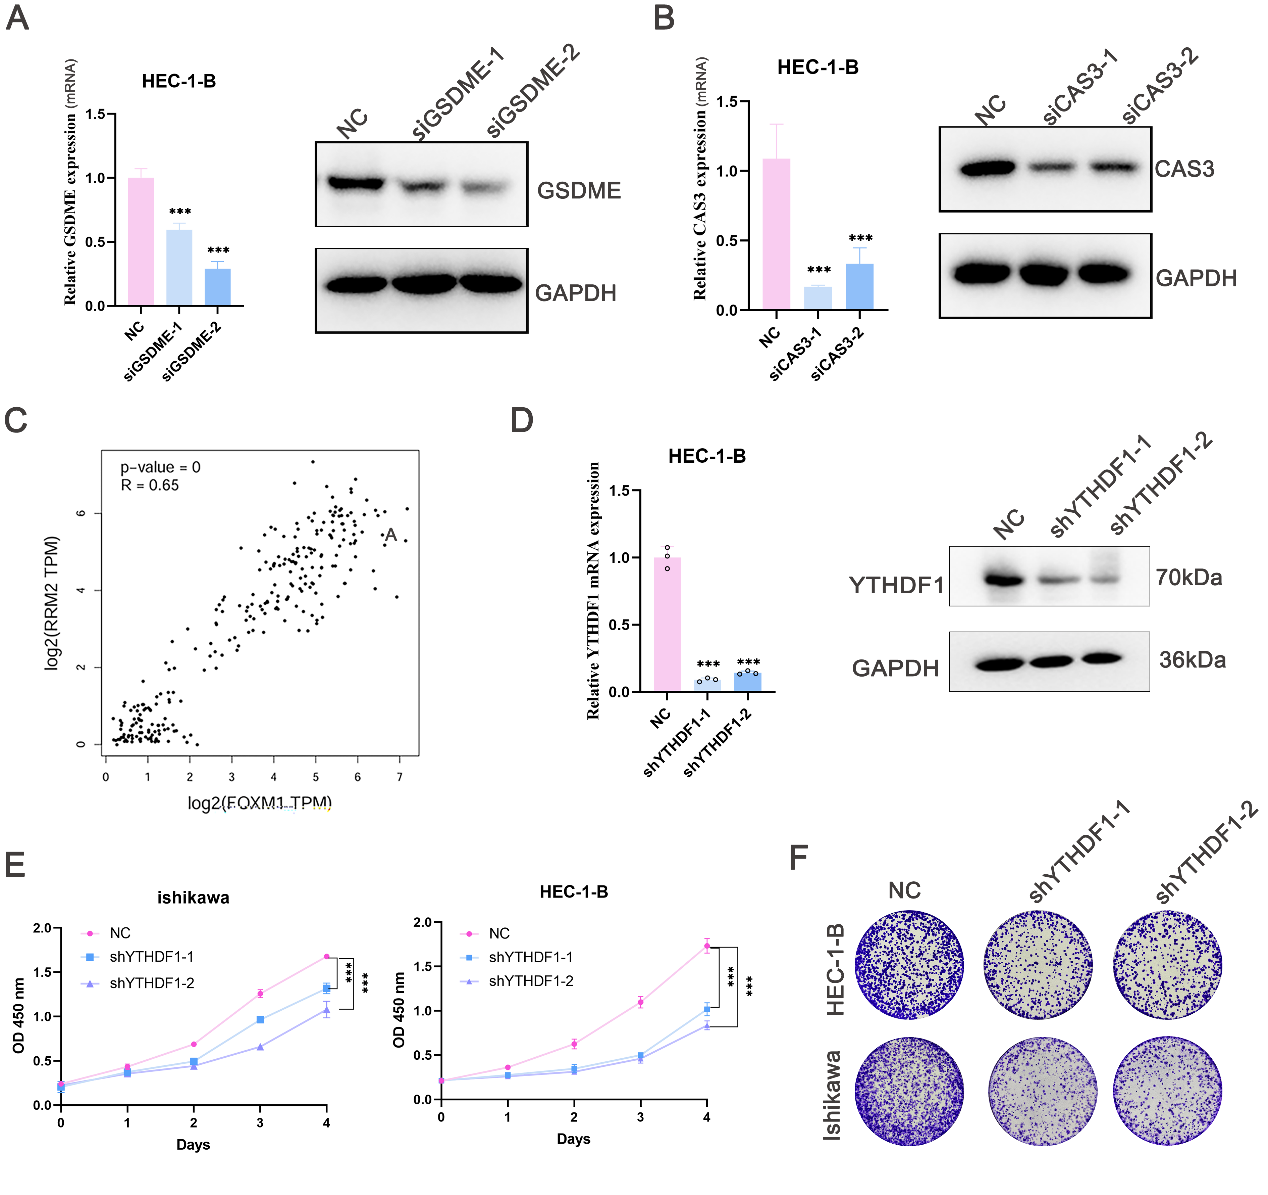


(A-B) RT-PCR and western blotting were used to validate the gene expression efficiency in HEC-1-B cells transfected with siRNA. (A) GSDME. (B) CAS3. (C) Correlation between FOXM1 mRNA and RRM2 mRNA from GEPIA database. (D)Messenger RNA and protein expression of YTHDF1 in cells transfected with shYTHDF1. (E) Proliferation of EC cells transfected with shYTHDF1. (F) Colony formation assay. Data are presented as mean ± SD; **P<0.01 compared to NC (control group). ***P<0.001 compared to NC (control group).

**Figure S3**


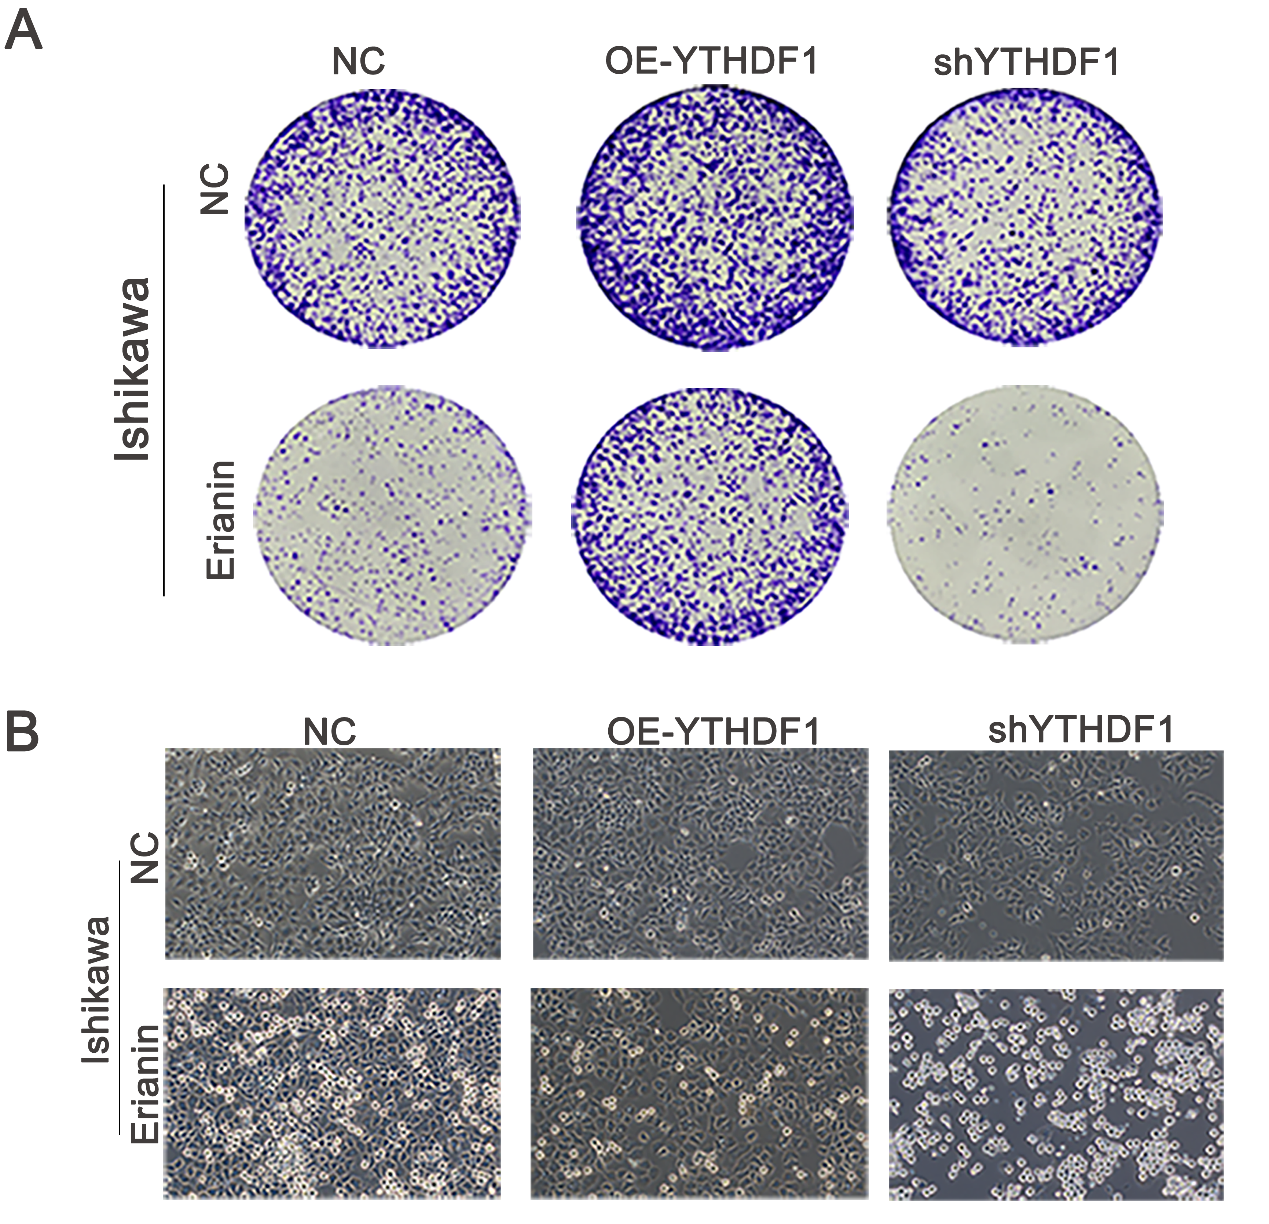


(A) The colony formation ability of YTHDF1 depleted and YTHDF1 overexpressed Ishikawa cells treated with erianin. (B) Observation of morphological features under a phase-contrast microscope in YTHDF1 depleted and YTHDF1 overexpressed Ishikawa cells treated with erianin. Scale bar = 100 μm.
